# Supplementary material for: Identification of Key Pathways and Establishment of a Seven-Gene Prognostic Signature in Cervical Cancer
Source: J Oncol. 2022 Feb 4;2022:4748796. doi: 10.1155/2022/4748796 (PMC8837458; doi:10.1155/2022/4748796)
Supplement: Supplementary Materials — Supplementary Figure 1: workflow chart of this study. Supplementary Figure 2: quality control of the six datasets. Supplementary Figure 3: KEGG analysis of the top 200 coexpressed genes of the 7 genes of the prognostic signature. KEGG, Kyoto Encyclopedia of Genes and Genomes. Supplementary Table 1: 108 Common DEGs of the six datasets. Supplementary Table 2: the associations between overall survival and 108 common DEGs using univariate cox analysis. Supplementary Table 3: the risk score and risk group of each patient of the TCGA database. Supplementary Table 4: gene sets enriched in the high-risk group. Supplementary Table 5: immune cells abundance analysis of the high-risk group and the low-risk group. [file 4748796.f1.zip]

Archive with 8 entries (8 files):
- 4748796.f1/Supplementary figure 1.png
- 4748796.f1/Supplementary Figure 2.pdf
- 4748796.f1/Supplementary Figure 3.pdf
- 4748796.f1/Supplementary Table 1.docx
- 4748796.f1/Supplementary Table 2.docx
- 4748796.f1/Supplementary Table 3.docx
- 4748796.f1/Supplementary Table 4.docx
- 4748796.f1/Supplementary Table 5.docx
