# Supplementary figures and images for: Identification of Key Pathways and Establishment of a Seven-Gene Prognostic Signature in Cervical Cancer
Source: Hindawi journal article supplement (doi:10.1155/2022/4748796), 2022-02-04

Group    Normal    Cancer

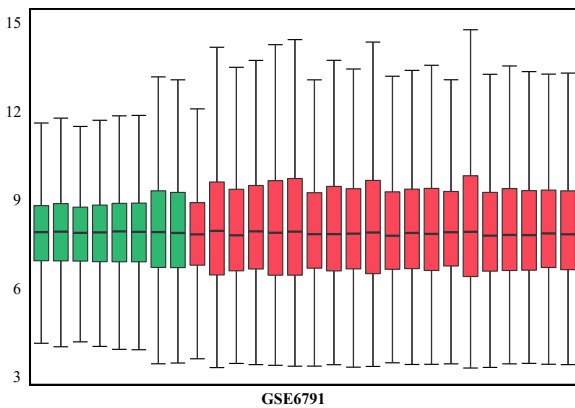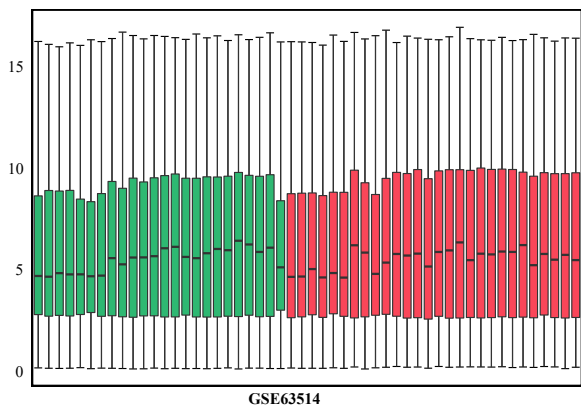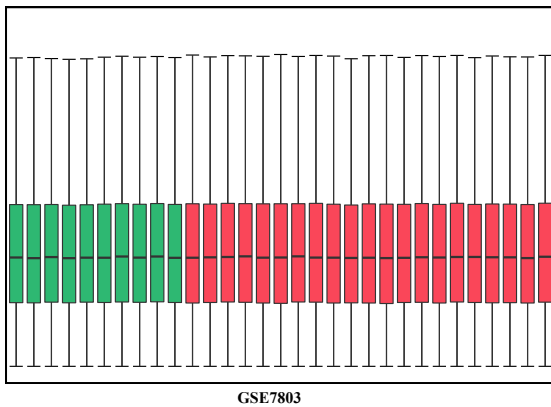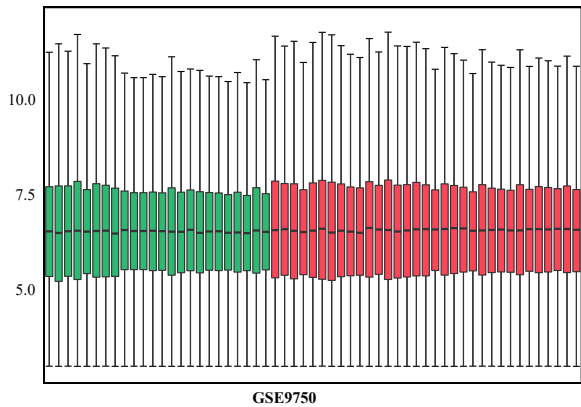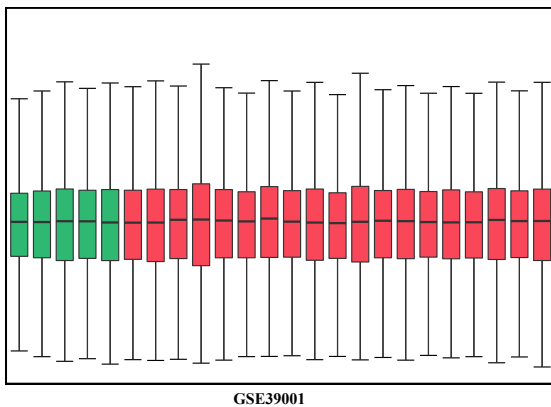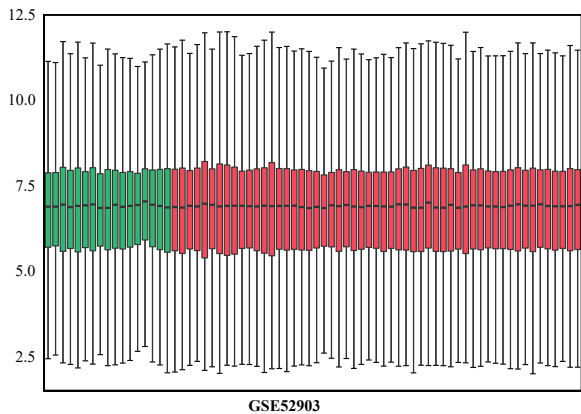

Supplement: f1 [file 4748796.f1.zip]
